# Supplementary material for: Synthesis, Structural Elucidation, and Anti-Inflammatory Activity of a Water-Soluble Derivative of Arctiin
Source: MDPI journal article supplement (doi:10.3390/molecules28041789), 2023-02-14

### Supplementary data

Supplementary data (HR-ESI-MS, ESI-MS<sup>2</sup>, <sup>1</sup>H-NMR, <sup>13</sup>C-NMR, DEPT ( $\theta = 90^\circ$ ), DEPT ( $\theta = 135^\circ$ ), HMBC and HSQC spectra for arctigenin-4'-O-glucuronide) associated with this article can be found as following:

Figure S1. HR-ESI-MS

Spectrum from 03.wiff (sample 1) - 03, -TOF MS (50 - 1000) from 2.080 to 2.192 min

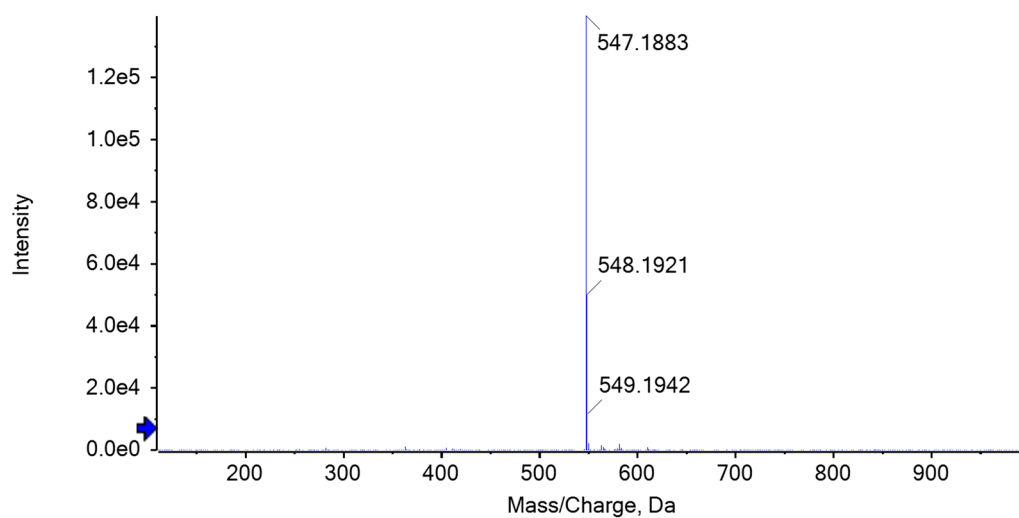

Figure S2. ESI-MS<sup>2</sup>

Spectrum from 03-ms2.wiff (sample 1) - 03-ms2, -T...S<sup>2</sup> of 547.0 (50 - 1000) from 1.894 to 2.153 min

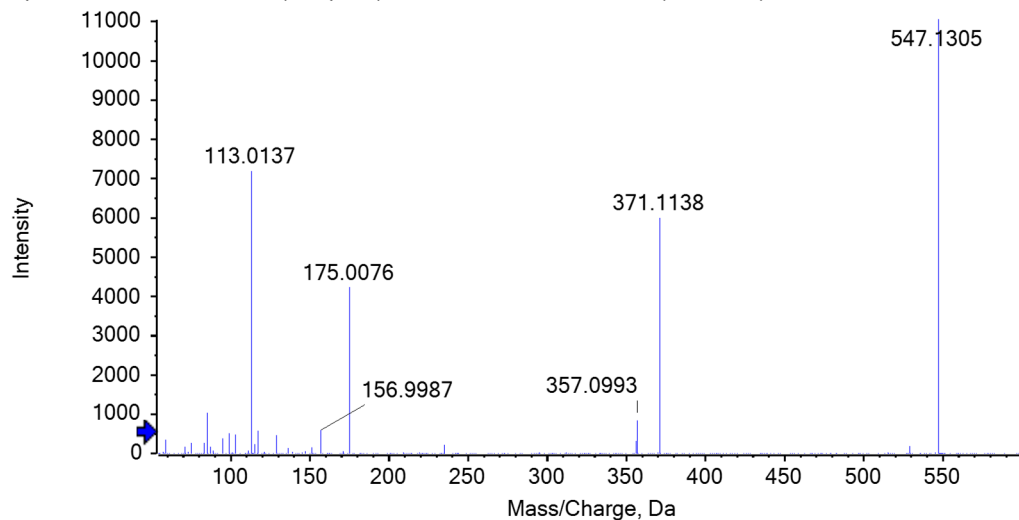

Figure S3.  $^1\text{H}$ -NMR (DMSO- $d_6$ )

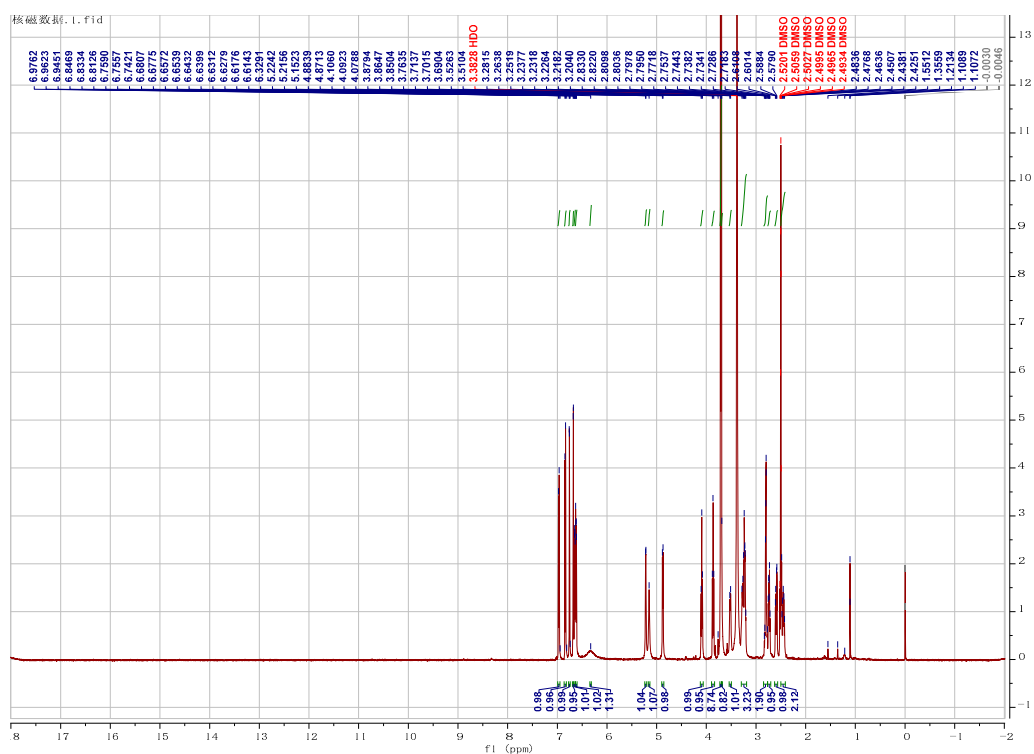

Figure S4.  $^{13}\text{C}$ -NMR (DMSO- $d_6$ )

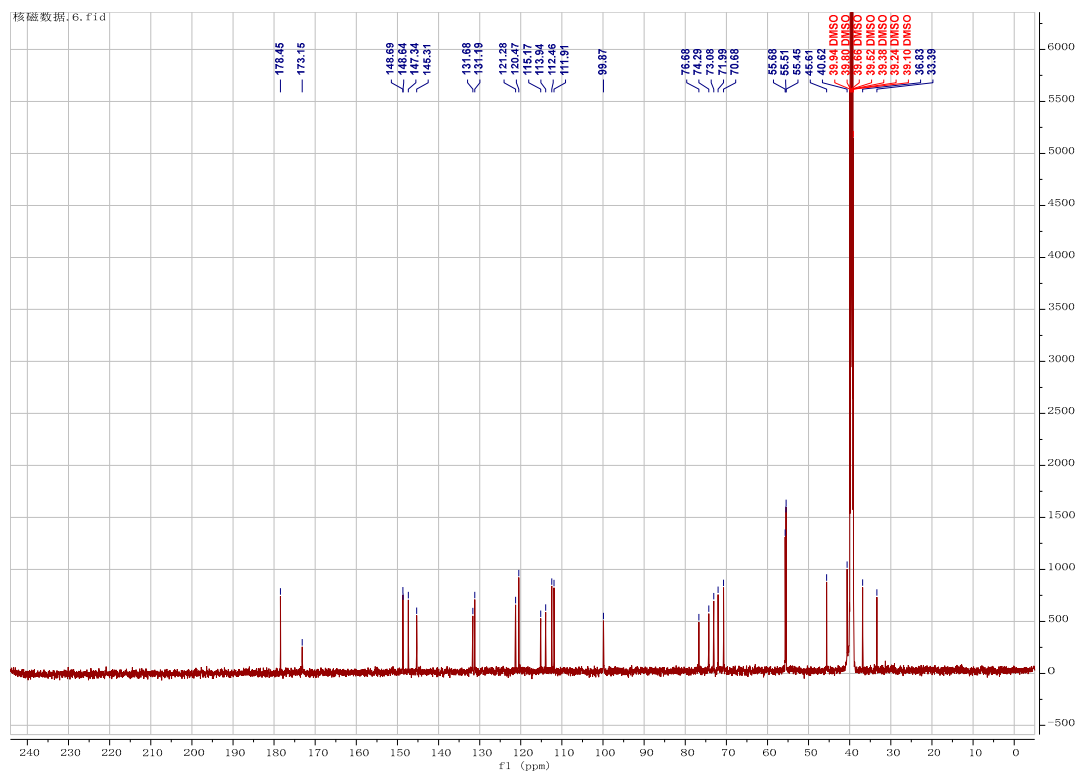

Figure S5. DEPT ( $\theta = 90^\circ$ ) (DMSO- $d_6$ )

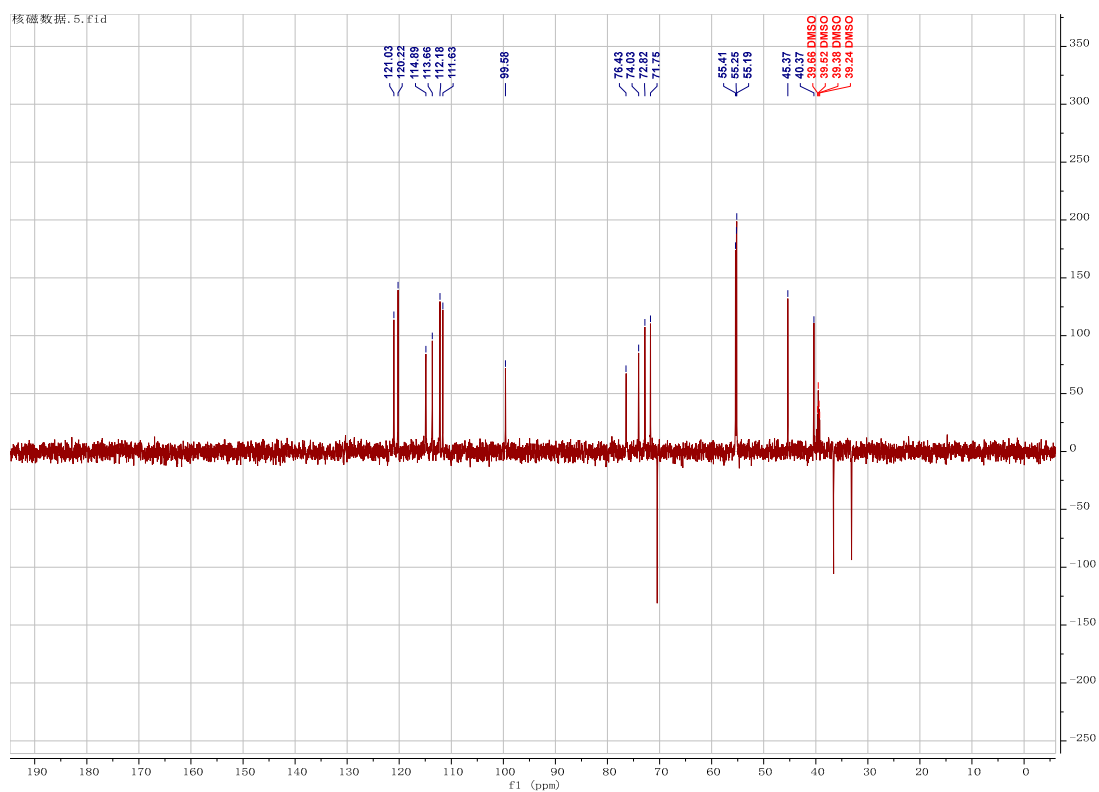

Figure S6. DEPT ( $\theta = 135^\circ$ ) (DMSO- $d_6$ )

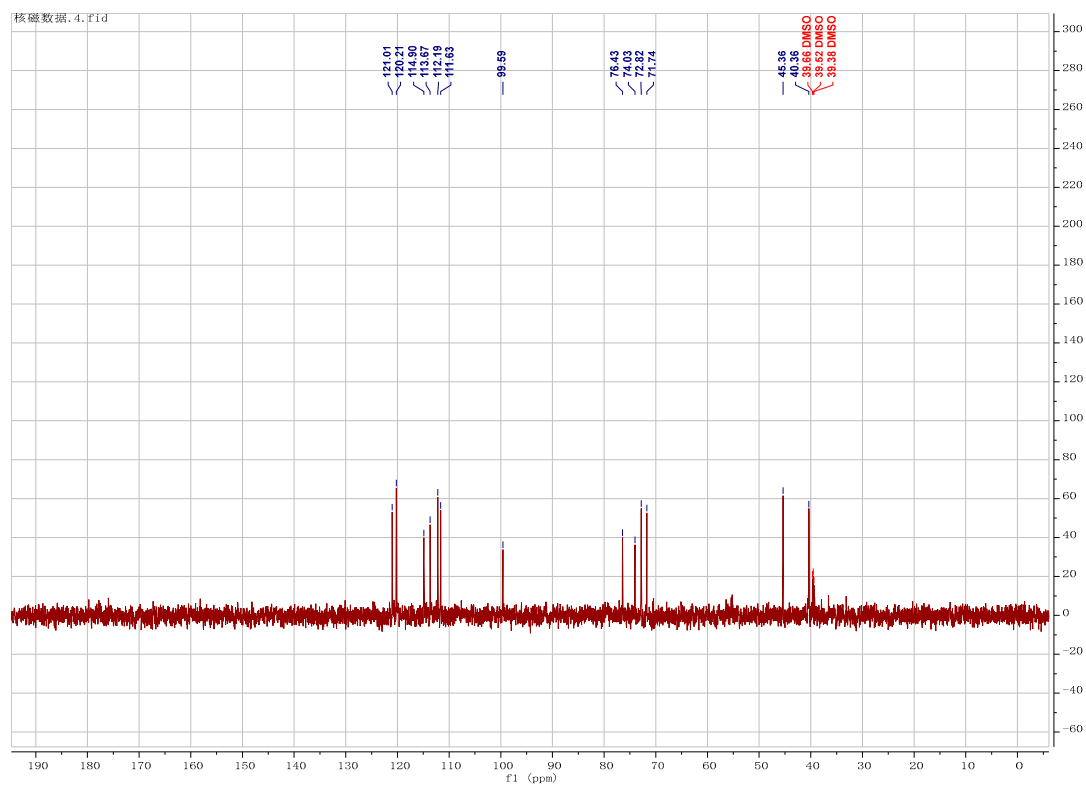

Figure S7. HMBC (DMSO- $d_6$ )

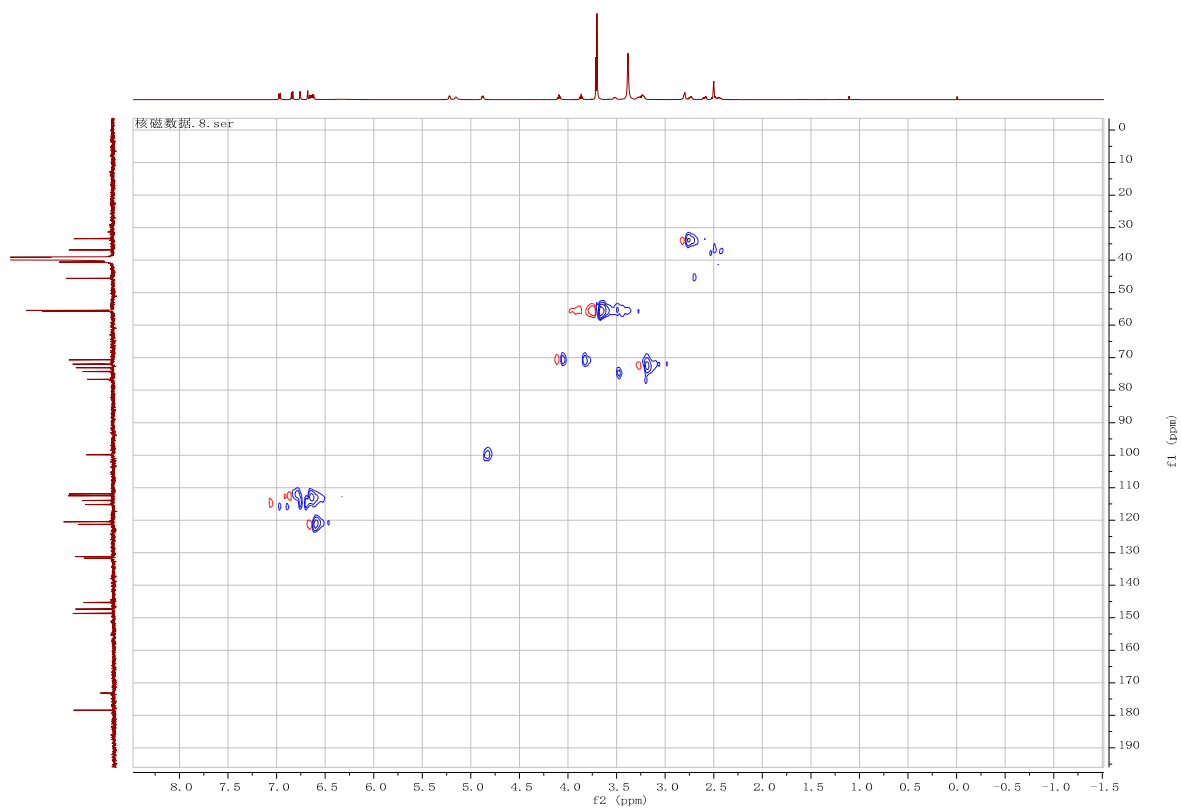

Figure S8. HSQC (DMSO- $d_6$ )

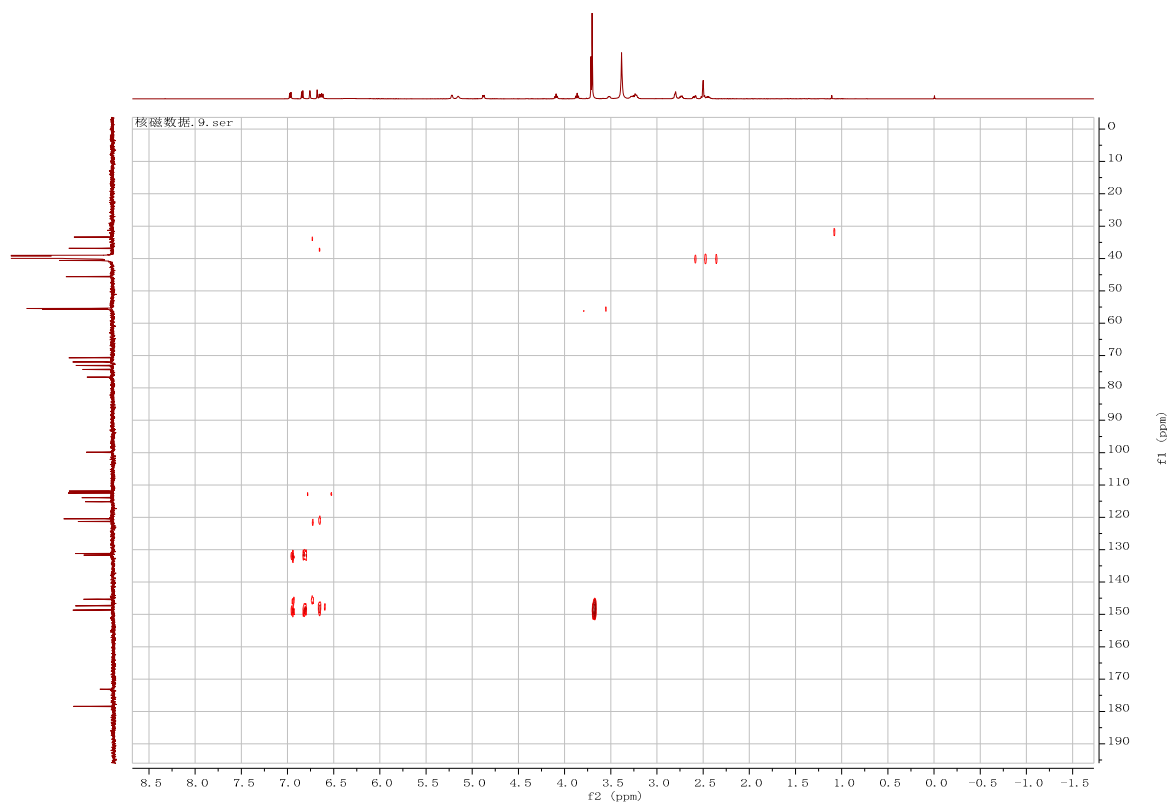

# IR (KBr)

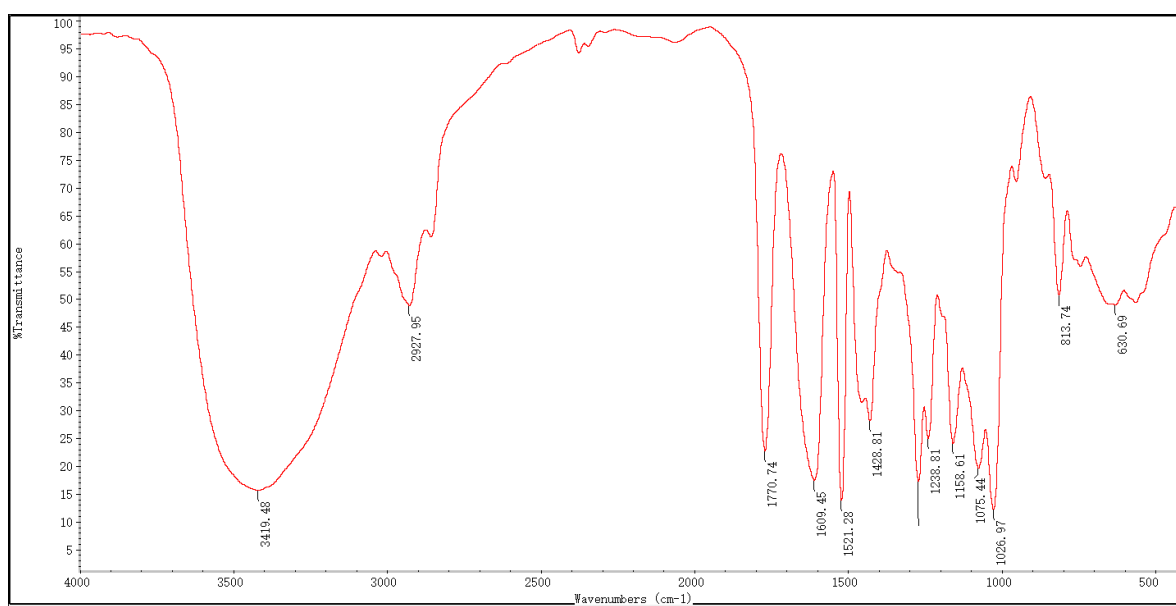

Supplement: s1 [file s1]
